# Supplementary material
Source: PubMed Central journal article supplement (PMC2390729)
Supplement: tpc.107.055632_1.pdf [file tpc.107.055632_1.pdf]

Supplemental Data. Schneider et al. (2008). Functional and physiological characterization of *Arabidopsis thaliana* *INOSITOL TRANSPORTER1*, a novel tonoplast-localized transporter for myo-inositol

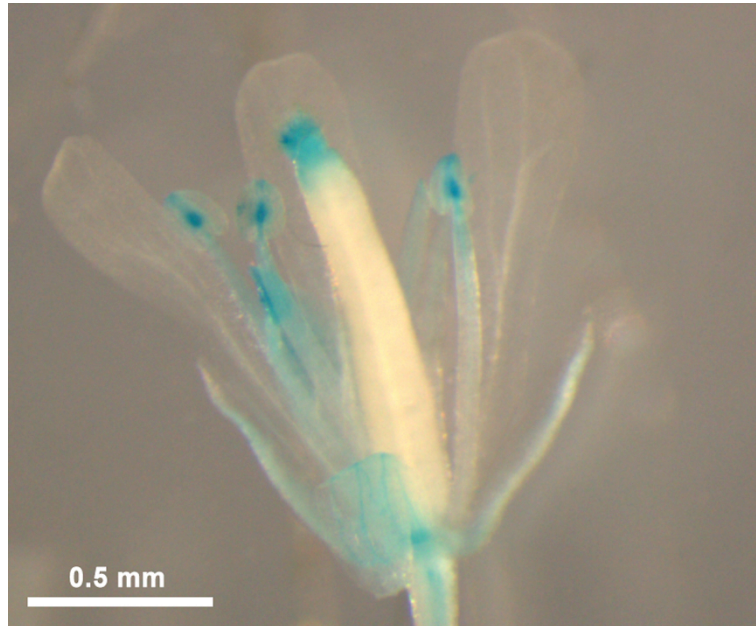

**Supplemental Figure 1. *GUS* reporter expression in a flower of an *INT1*-promoter-*GUS* plant.**

White light image showing the complete absence of GUS from the main part of the silique and from the seeds. Bar = 0.5 mm.
